# Supplementary material
Source: HighWire-hosted journal article supplement (https://jnm.snmjournals.org/highwire/filestream/94873/field_highwire_adjunct_files/0/163493_Supplemental_Data.pdf)
Supplement: 163493_Supplemental_Data.pdf [file 163493_Supplemental_Data.pdf]

## 1 Supplemental Methods

2

### 3 Radiosynthesis

4 Automated production of  $^{18}\text{F}$ -THK5117 was performed on a Raytest® SynChrom R&D single  
5 reactor synthesizer. Solvent containers (SC) were loaded with reagents, and cartridges were  
6 assembled on the synthesizer. The manufacturing process was performed automatically using  
7 the Raytest® control software. No-carrier-added  $^{18}\text{F}$ -fluoride was produced via  $^{18}\text{O}(\text{p}, \text{n})^{18}\text{F}$   
8 reaction by proton irradiation of  $^{18}\text{O}$ -enriched water and directly delivered to an ion exchange  
9 cartridge (Chromabond PS- $\text{HCO}_3^-$ , Macherey Nagel, Trap 1). The trapped  $^{18}\text{F}$ -fluoride was  
10 eluted into the reactor using a mixture of Kryptofix®222 (12.5 mg), potassium carbonate  
11 (12.5  $\mu\text{L}$ , 1 M), water (187.5  $\mu\text{L}$ ) and acetonitrile (800  $\mu\text{L}$ ) from SC 2. The solution was  
12 evaporated to dryness by azeotropic distillation, and the drying process was repeated after  
13 addition of acetonitrile (0.8 mL) from SC 3. The precursor (2 mg) in DMSO (0.7 mL) was  
14 transferred from SC 1 to the reactor, and the mixture was heated at 110°C for 10 min. HCl (0.2  
15 mL, 2 M) from SC3 was then added, and the mixture stirred for 3 min. at 110°C. After  
16 quenching with AcOK (0.1 mL, 4 M) in  $\text{H}_2\text{O}$  (5 mL) from SC 4, the mixture was transferred to  
17 a SepPak tC18 Plus Short cartridge (Waters, Trap 2), which was then washed with  $\text{H}_2\text{O}$  (5 mL,  
18 SC wash). Radioactive products were eluted with EtOH/ $\text{H}_2\text{O}$  1:1 (4 mL, SC Elute) and purified  
19 via semi-preparative HPLC (Inertsil ODS-4 C18 column, 250 x 10 mm, 5  $\mu\text{m}$ ; isocratic elution  
20 with 55%  $\text{NaH}_2\text{PO}_4$  (20 mM) / 45% acetonitrile; flow: 5 ml/min; UV-detection: 360 nm). The  
21 HPLC purified product peak was collected in SC 11, diluted with  $\text{H}_2\text{O}$  (20 mL) and ascorbic  
22 acid (0.5 mL, 25%) from SC 8 and passed through a tC18 SepPak Plus Short cartridge  
23 (Waters, Trap 3). The radiolabelled product was eluted with anhydrous ethanol (1 mL) from  
24 SC 7 into the product vial, diluted with 0.9% saline (9 ml) from SC 9 and filtered through a  
25 sterile filter (Acrodisc®, 0.2  $\mu\text{m}$ , PALL). The RCY was  $16 \pm 2\%$  (n=8) and RCP 99% with 75 min  
26 synthesis time. Purity was confirmed via analytical HPLC (Inertsil ODS-4 C18 column, 150 x  
27 4.6 mm, 5  $\mu\text{m}$ ; isocratic elution with 50%  $\text{NaH}_2\text{PO}_4$  (20 mM) / 50% acetonitrile; flow: 1.5 ml/min;  
28 UV-detection: 360 nm).

1

## 2 **Animals**

3 Animals were housed in a temperature- and humidity-controlled environment with a 12-hr light-  
4 dark cycle, with free access to food (Ssniff, Soest, Germany) and water.

5 Tau-P301S mice:

6 Transgenic Tau-P301S (P301S) mice express human P301S mutant 4R/0N Tau (Thy1-  
7 hTau.P301S) in CBA.C57BL/6 background (1). This model is characterized by tau  
8 hyperphosphorylation first and mainly in the brainstem, where tau filaments appear  
9 predominately as half-twisted ribbons. Larger AD-like paired helical filaments are observed  
10 less frequently. Behavioral defects manifest as early motor impairment at age 4 months and  
11 learning deficits from 2.5 months of age, leading to early death before 12 months of age. Four  
12 P301S mice aged 5.5 months and seven P301S mice aged 8-11 months were used for this  
13 study, compared to seven age-matched C57Bl/6 littermates serving as controls.

14 biGT mice:

15 Double transgenic biGT mice were developed by crossing Tau-P301L (P301L) homozygous  
16 transgenic mice with GSK3- $\beta$ .S9A transgenic mice (2). The P301L mice express human  
17 4R/2N-tau with the P301L mutation, under control of the murine THY1 promoter. Parental  
18 P301L mice show clinical symptoms from age 6-7 months, followed by intraneuronal tangles  
19 first and most markedly in the hindbrain (midbrain, brainstem, spinal cord), leading to death  
20 before age 12 months (3). biGT mice co-express Tau-P301L with constitutively active GSK3-  
21  $\beta$ .S9A in the same neurons, leading to very severe tauopathy in cortex and hippocampus (2).  
22 These mice have an extended lifespan in comparison to P301L mice, ascribed to the less  
23 intense tauopathy in their hindbrain (4). The regional re-distribution is caused by GSK3- $\beta$   
24 dependent altered phosphorylation of Tau in the biGT mice. Tau depositions in biGT mice are  
25 highly fibrillar inclusions with the typical GSK3- $\beta$  dependent phosphorylation signatures,

1 including S396/S404. The outcome is a very dramatic tauopathy in the forebrain of aged (14-  
2 18 months) biGT animals (2).

3 Eight biGT mice aged 12 months and eight biGT mice aged 21 months were analysed in this  
4 study. As age-matched FVB/N littermates were not available we additionally studied four  
5 C57Bl/6 and five Balb-C mice aged 12 months as well as four C57Bl/6 and five Balb-C mice  
6 aged 22 months. After exclusion of any age- or background-related differences in  $^{18}\text{F}$ -THK5117  
7 binding, the entire WT group (N=25) was pooled to allow increase of statistical power for VOI-  
8 based and statistical parametric mapping (SPM)-based analyses.

9

## 10 **Tau-PET Data Acquisition and Analyses**

11 Mice were anesthetized with isoflurane (1.5%, delivered at 3.5 l/min) and placed in the aperture  
12 of the Siemens Inveon DPET (5) as described previously (6).

13 P301S mice and seven age-matched C57Bl/6 controls were scanned in a full dynamic setting:  
14 upon injection to a tail vein of  $16.1 \pm 2.4$  MBq  $^{18}\text{F}$ -THK5117 in 150  $\mu\text{l}$  saline, a 90 min emission  
15 recording was initiated, followed by a 15 min transmission scan using a rotating  $^{57}\text{Co}$  point  
16 source. Dynamic acquisitions consisted of 21 frames (3x1/6x2/9x5/3x10 min). Reconstruction  
17 was performed with 4 OSEM3D and 32 MAP3D iterations, and a zoom factor of 1.0, with  
18 scatter-, attenuation-, and decay-correction, resulting in a final voxel dimension of  
19 0.78x0.78x0.80 mm.

20 Subsequently biGT mice and age-matched control mice were scanned with the single 30 min  
21 frame beginning 20 min after injection of  $15.9 \pm 2.8$  MBq  $^{18}\text{F}$ -THK5117; all other parameters  
22 remained constant. Anaesthesia was maintained between injection and start of the  $\mu\text{PET}$  scan  
23 to exclude confounds from differing physiological state, and to ensure comparability between  
24 strains.

1 Following recovery from anaesthesia, mice were returned to their home cages, or were killed  
2 by cervical dislocation while still deeply anesthetized, prior to rapid brain removal.

3

#### 4 **Tau-PET Reader Independent Coregistration**

5 To this end, SUV images were generated in this frame for all mice after the final manual MRI-  
6 atlas coregistration ( $TX_{\text{rigid}}$ ). Attenuation and decay-corrected images of all TG and WT mice  
7 were averaged to generate a 20-50 min standard template. Non-linear brain normalization was  
8 performed with the PMOD fusion tool for all single frame SUV images coregistered to the MRI  
9 atlas to obtain transformation ( $TX_{\text{BrainNorm}}$ ) for each mouse brain to the template. The manual  
10 ( $TX_{\text{rigid}}$ ) and automatic ( $TX_{\text{BrainNorm}}$ ) transformations were concatenated and applied to the  
11 native space  $\mu$ PET data to guarantee a minimum of interpolation. As the  $\mu$ PET templates had  
12 been initially aligned to the MRI mouse brain atlas, all final fused  $\mu$ PET images had the voxel  
13 dimensions of the MRI mouse brain atlas, i.e. 0.064 x 0.064 x 0.064 mm.

14

#### 15 **Immunohistochemistry**

16 Following transcardial perfusion of the mice with phosphate buffered saline (PBS), brains were  
17 removed and fixed in 4% PFA in PBS over night at 4°C. 50  $\mu$ m free-floating sections in the  
18 sagittal plane for P301S mice and in the coronal plane for biGT mice were cut on a vibratome  
19 (VT1000S, Leica Microsystems GmbH, Wetzlar, Germany). Two sections from each animal  
20 were analyzed, for P301S mice representative sections cut about 1.5 mm from the midline, for  
21 biGT mice sections -1.7 mm and -2.8 mm from bregma.

22 During all following steps, sections were kept on a shaker at room temperature. To  
23 permeabilize the tissue, the sections were incubated overnight in 2% Triton X-100 in PBS.  
24 Non-specific epitopes were blocked with Casein I-Block (Invitrogen) for 2 hours. AT8 antibody  
25 (Thermo Scientific) recognizing phospho-PHF-tau phosphorylated at Ser202 and Thr205 was

1 applied o/n, diluted 1:200 in Casein-I. Detection was performed by incubating the sections with  
2 secondary goat anti-rabbit antibody conjugated to Alexa Fluor 488 (1:500 in Casein-I; Life  
3 Technologies) for 4 hours. Sections were finally washed 3x15 min with casein-I before  
4 mounting on glass coverslips using fluorescence mounting medium (Dako, Glostrup,  
5 Denmark). 3D image stacks were acquired on an epi-fluorescence microscope (Axio  
6 Imager.M2 with ApoTome.2, Jena, Zeiss, Germany). Imaging of the whole slice was performed  
7 in tile scan mode, which allows automatic stitching of an array of fields of view with series of  
8 10  $\mu\text{m}$  z-stack projections.

9 The area and number of cells positive for AT8 were automatically counted using Imaris  
10 software (Imaris 7. 6.5; Bitplane, Zurich) in following regions of interest: for P301S mice the  
11 hindbrain part of brain stem ( $0.66\pm 0.28 \text{ mm}^3$ ) and for biGT mice amygdalar nucleus, piriform,  
12 entorhinal and perirhinal cortical areas ( $0.33\pm 0.08 \text{ mm}^3$ ) were assessed.

13 Methoxy-X04 staining was performed as described previously (7).

14

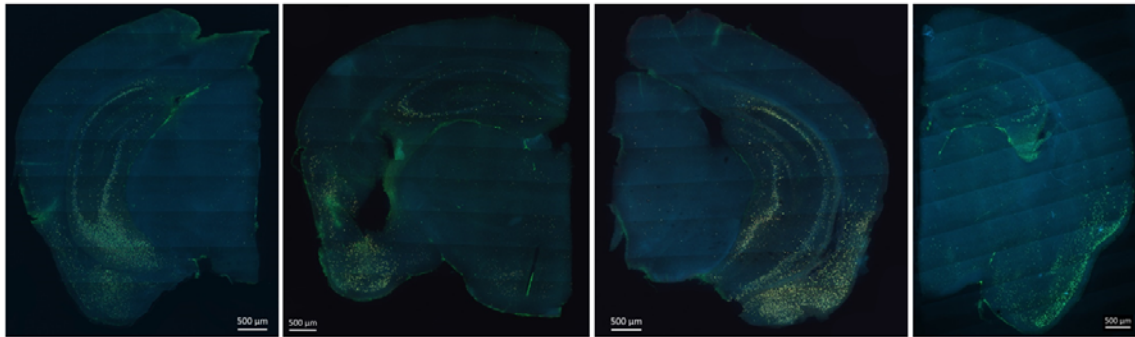

15 **Supplemental Figure 1:** Several AT8 stained coronal planes from biGT mice (all 21 months)  
16 are shown for illustrative purposes in order to give an impression on the regional heterogeneity.

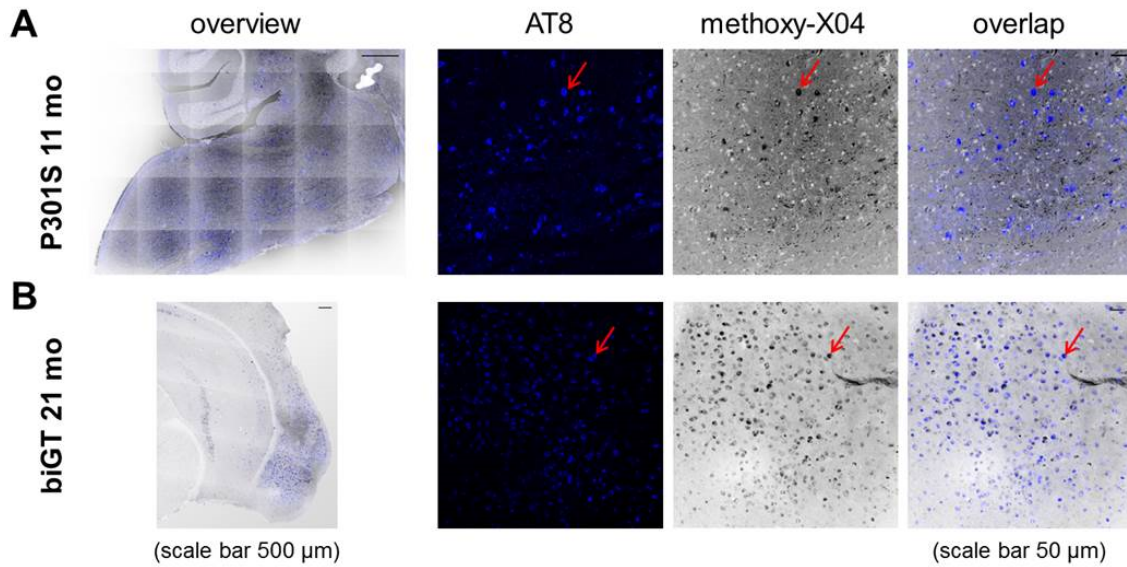

1

2 **Supplemental Figure 2:** Exemplary sagittal slice from a P301S mouse aged 11 months of  
 3 the brainstem (A) and a sagittal slice from a biGT mouse aged 21 months of entorhinal and  
 4 post-piriform cortices (B). In the zoomed panels from left to right: AT8 staining for  
 5 hyperphosphorylated tau, methoxy-X04 staining for  $\beta$ -sheet structures, as well as the fusion  
 6 indicating a high overlap. Red arrows indicate tau deposition which is depicted by both AT8  
 7 and methoxy-X04 staining.

8

### 9 ***Ex Vivo* and *In Vitro* Autoradiography**

10 Brains were resected and immediately frozen by immersion in isopentane at  $-40\text{ }^{\circ}\text{C}$ , mounted  
 11 in a cryostat (Leica CM 1510-1, Leica Microsystems, Nussloch, Germany), and, after thermal  
 12 equilibration at  $-20\text{ }^{\circ}\text{C}$  for 30 min prior, were cut into  $20\text{ }\mu\text{m}$  thick sections in the sagittal plane.  
 13 Selected sections were mounted on glass slides and placed on Fujifilm BAS cassette2 2025  
 14 imaging plates. The plates were exposed for six hours and then scanned at  $25\text{ }\mu\text{m}$  resolution  
 15 with the Raytest equipment (CR-35-BIO, Dürr Medical, Germany). Resulting images were  
 16 analyzed with dedicated software (AIDA image analysis, V4.50, Raytest GmbH,  
 17 Straubenhardt, Germany).  $50\text{-}\mu\text{m}$  thick coronal brain sections from biGT mice neighbouring  
 18 previously immunohistochemically analysed sections were used for autoradiography *in vitro*.

1 Slide-mounted brain sections were first pre-incubated with binding buffer (Tris-HCl 50 mM, pH  
2 7.4) and then dried, prior to incubation in 2 nM  $^{18}\text{F}$ -THK5117 for 60 minutes at room  
3 temperature. Blocking studies were made with the addition of 10  $\mu\text{M}$  THK5117 to the  
4 incubation mixture in order to prove **saturable** binding. Slides were then washed by immersion  
5 in ice-cold binding buffer (3 times, 30 seconds each), rapidly dried under an air stream, and  
6 then placed on imaging screens for six hours, prior to digitization and analysis as described  
7 above. 20  $\mu\text{m}$  slices originating from P301S and C57Bl/6 *ex vivo* autoradiography were as well  
8 co-analysed with *in vitro* technique (without blocking) for visual purposes.

9

## 10 **Supplemental Limitations**

11 *Hot Spot.* In 6/18 (33%) of our mice with C57Bl/6 background (TG and WT) we saw a hot-  
12 spot of  $^{18}\text{F}$ -THK5117 accumulation lying between the frontal pole and the olfactory bulb, the  
13 intensity of which increased with scanning time. This hot spot was clearly confirmed by  
14 autoradiography *ex vivo* (see Supplemental Fig. 3), but was absent in corresponding slices  
15 examined by autoradiography *in vitro*, and was also lacking to immunohistochemical  
16 examination. We suppose that this focal radioactivity accumulation may be related to  
17 sinusoidal drainage or distortion of the adjacent mucosa. In the absence of a definite  
18 anatomical/physiological explanation, the intermittent hot-spot presents a limiting factor for  
19 quantitation of  $^{18}\text{F}$ -THK5117 binding in the mouse frontal cortex.

**A**  $^{18}\text{F}$ -THK5117 PET 20-50 min; C57Bl/6

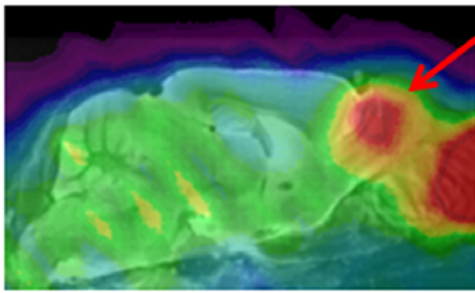

**B**  $^{18}\text{F}$ -THK5117 ex vivo autoradiography  
55 min p.i.; C57Bl/6

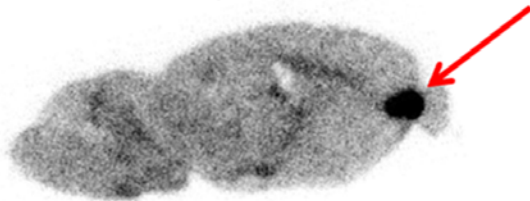

1

2 **Supplemental Figure 3:** Illustration of the unexpected frontal hot spot in  $\mu\text{PET}$  (A) and  
3 corresponding *ex vivo* autoradiography (B).

4

5 *Translational Aspect.* Tau depositions in both of the transgenic models originate from FTLD  
6 mutations with and without additional GSK3- $\beta$  overexpression to induce a more intense and  
7 AD-like tau pathology. While our study clearly proves the principle of *in vivo* imaging of tau  
8 pathology, the model differences must be considered for translational validity to AD. In general,  
9 rodent models best emulating the human AD tau pathology present an advantage for  
10 translation, in presenting the best possible congruence between rodent and human molecular  
11 imaging.

12 *Background.* Age-matched FVB/N and/or single transgenic GSK3- $\beta$ .S9A controls as the  
13 appropriate background for biGT mice were not available. Thus we cannot fully exclude a bias  
14 resulting from the substitution of age-matched C57Bl/6 and Balb-C mice. Nonetheless we did  
15 not observe any age- or background-related differences in cerebral  $^{18}\text{F}$ -THK5117 binding of  
16 C57Bl/6 and Balb-C mice. Furthermore, correlation analyses of  $\mu\text{PET}$  estimates and



1 immunohistochemistry in the transgenic animals confirmed the validity of biGT  $\mu$ PET results,  
2 irrespective from findings in WT animals.

3 *Structural information.* Our present instrumentation does not afford hybrid imaging, but we  
4 concur that small animal PET-MRI (or PET-CT) hybrid imaging could further improve  
5 quantitation of preclinical Tau imaging, especially with regard to effects of atrophy. For the  
6 present, stand-alone PET studies must suffice, since the hybrid PET-MRI systems are still not  
7 widely available. Based on our experience, we feel that automatized non-linear brain  
8 normalization can partially accommodate inter-animal variability with regard both to variance  
9 between the strains and between individual mice. As the PET template used for this spatial  
10 normalization was obtained as a composite of all individual MRI-atlas-fused images, we can  
11 assume a high degree of agreement between spatially normalized PET images with the MRI  
12 mouse brain atlas for both strains.

13

#### 14 **Supplemental References**

15 1. Allen B, Ingram E, Takao M, et al. Abundant tau filaments and nonapoptotic  
16 neurodegeneration in transgenic mice expressing human P301S tau protein. *J Neurosci.* 2002;22:9340-  
17 9351.

18

19 2. Terwel D, Muyliaert D, Dewachter I, et al. Amyloid activates GSK-3beta to aggravate neuronal  
20 tauopathy in bigenic mice. *Am J Pathol.* 2008;172:786-798.

21

22 3. Terwel D, Lasrado R, Snauwaert J, et al. Changed conformation of mutant Tau-P301L underlies  
23 the moribund tauopathy, absent in progressive, nonlethal axonopathy of Tau-4R/2N transgenic mice.  
24 *J Biol Chem.* 2005;280:3963-3973.

25

26 4. Crespo-Biel N, Theunis C, Borghgraef P, et al. Phosphorylation of protein Tau by GSK3beta  
27 prolongs survival of bigenic Tau.P301LxGSK3beta mice by delaying brainstem tauopathy. *Neurobiol Dis.*  
28 2014;67:119-132.

29

30 5. Visser EP, Disselhorst JA, Brom M, et al. Spatial resolution and sensitivity of the Inveon small-  
31 animal PET scanner. *J Nucl Med.* 2009;50:139-147.

32

33 6. Rominger A, Mille E, Zhang S, et al. Validation of the octamouse for simultaneous  $^{18}\text{F}$ -fallypride  
34 small-animal PET recordings from 8 mice. *J Nucl Med.* 2010;51:1576-1583.

1

2 **7.** Rominger A, Brendel M, Burgold S, et al. Longitudinal assessment of cerebral beta-amyloid  
3 deposition in mice overexpressing Swedish mutant beta-amyloid precursor protein using 18F-  
4 florbetaben PET. *J Nucl Med.* 2013;54:1127-1134.

5
